1 VGF in cerebrospinal fluid, when combined with conventional biomarkers, enhances prediction  
2 of conversion from mild cognitive impairment to Alzheimer's Disease.

3

4 Authors: Daniel A. Llano<sup>1,2</sup>, Priya Devanarayan<sup>3</sup>, Viswanath Devanarayan<sup>4,5</sup>, for the Alzheimer's  
5 Disease Neuroimaging Initiative (ADNI)\*

6 1. Department of Molecular and Integrative Physiology, University of Illinois at Urbana-  
7 Champaign, IL

8 2. Carle Neuroscience Institute, Urbana, IL

9 3. Souderton Area High School, Souderton, PA

10 4. Charles River Laboratories, Horsham, PA

11 5. Department of Mathematics, Statistics and Computer Science, University of Illinois at  
12 Chicago, IL

13

14 \*Data used in preparation of this article were obtained from the Alzheimer's Disease  
15 Neuroimaging Initiative (ADNI) database ([adni.loni.usc.edu](http://adni.loni.usc.edu)). As such, the investigators  
16 within the ADNI contributed to the design and implementation of ADNI and/or provided data  
17 but did not participate in analysis or writing of this report. A complete listing of ADNI  
18 investigators can be found at:

19 [http://adni.loni.usc.edu/wp-content/uploads/how\\_to\\_apply/ADNI\\_Acknowledgement\\_List.pdf](http://adni.loni.usc.edu/wp-content/uploads/how_to_apply/ADNI_Acknowledgement_List.pdf)

20

21 Acknowledgments: The authors thank Professor Danielle Harvey from UC Davis for providing  
22 valuable input regarding the ADNI imaging data.

23

24 Corresponding Author:

25 Daniel Llano MD, PhD, Department of Molecular and Integrative Physiology, University of  
26 Illinois at Urbana-Champaign 61801

27 Disclosures:

28 Viswanath Devanarayan is an employee of Charles River Laboratories, and as such owns equity  
29 in, receives salary and other compensation from Charles River Laboratories.

30

31 *Data collection and sharing for this project was funded by the Alzheimer's Disease  
Neuroimaging Initiative (ADNI) (National Institutes of Health Grant U01 AG024904) and DOD*

32 *ADNI (Department of Defense award number W81XWH-12-2-0012). ADNI is funded by the*  
33 *National Institute on Aging, the National Institute of Biomedical Imaging and Bioengineering,*  
34 *and through generous contributions from the following: AbbVie, Alzheimer's Association;*  
35 *Alzheimer's Drug Discovery Foundation; Araclon Biotech; BioClinica, Inc.; Biogen; Bristol-*  
36 *Myers Squibb Company; CereSpir, Inc.; Eisai Inc.; Elan Pharmaceuticals, Inc.; Eli Lilly and*  
37 *Company; EuroImmun; F. Hoffmann-La Roche Ltd and its affiliated company Genentech, Inc.;*  
38 *Fujirebio; GE Healthcare; IXICO Ltd.; Janssen Alzheimer Immunotherapy Research &*  
39 *Development, LLC.; Johnson & Johnson Pharmaceutical Research & Development LLC.;*  
40 *Lumosity; Lundbeck; Merck & Co., Inc.; Meso Scale Diagnostics, LLC.; NeuroRx Research;*  
41 *Neurotrack Technologies; Novartis Pharmaceuticals Corporation; Pfizer Inc.; Piramal Imaging;*  
42 *Servier; Takeda Pharmaceutical Company; and Transition Therapeutics. The Canadian*  
43 *Institutes of Health Research is providing funds to support ADNI clinical sites in Canada.*  
44 *Private sector contributions are facilitated by the Foundation for the National Institutes of*  
45 *Health ([www.fnih.org](http://www.fnih.org)). The grantee organization is the Northern California Institute for*  
46 *Research and Education, and the study is coordinated by the Alzheimer's Disease Cooperative*  
47 *Study at the University of California, San Diego. ADNI data are disseminated by the Laboratory*  
48 *for Neuro Imaging at the University of Southern California.*

49

## 50 **Abstract**

51 Sensitive and accurate biomarkers for the prediction of conversion from mild cognitive  
52 impairment (MCI) to Alzheimer's Disease (AD) are needed to both support clinical care and  
53 enhance clinical trial design. Here, we examined the potential of cerebrospinal fluid (CSF) levels  
54 of a peptide derived from a neural protein involved in synaptic transmission, VGF (a non-  
55 initialism), to enhance accuracy of prediction of conversion from MCI to AD. The performance  
56 of conventional biomarkers (CSF A $\beta$ 1-42 and phosphorylated tau +/- hippocampal volume) was  
57 compared to the same biomarkers with CSF VGF peptide levels. It was observed that VGF  
58 peptides are lowered in patients with AD compared to controls and that combinations of CSF  
59 A $\beta$ 1-42 and phosphorylated tau, hippocampal volume and VGF peptide levels outperformed  
60 conventional biomarkers alone (hazard ratio = 2.2 vs. 3.9). VGF peptide levels were correlated  
61 most strongly with total tau levels, but not hippocampal volume, suggesting that they serve as a

62 marker for neuronal degradation, but not necessarily in the hippocampus. The latter point  
63 suggests that VGF may serve as a more general marker of neurodegeneration. Future work will  
64 be needed to determine the specificity of VGF for AD vs. other neurodegenerative diseases.

## 65 **Introduction**

66 Alzheimer Disease (AD) is characterized by a long prodromal course during which a number of  
67 pathological changes occur prior to the onset of clinical symptoms. Classically, these changes  
68 include the deposition of amyloid beta ( $A\beta$ ) and phosphorylated tau (pTau) into the brain,  
69 hippocampal atrophy and disruptions of metabolism, particularly in the temporal and parietal  
70 cortices (for review of preclinical pathology and biomarkers, please see [1]). It is speculated that  
71 these biomarkers are part of a cascade whereby  $A\beta$  triggers a series of pathological events,  
72 leading to neuronal dysfunction, hyperphosphorylation of tau and consequent synaptic loss,  
73 leading to volume loss and metabolic disruption [2-4]. These changes have formed the basis for  
74 the use of a series of fluid and imaging biomarkers to facilitate clinical and research practice.

75  
76 AD biomarkers may be used to 1) achieve earlier diagnoses for patients, 2) predict which  
77 individuals are most likely to clinically worsen over time, 3) help to identify and stratify subjects  
78 enrolling in AD-related clinical trials and 4) serve as outcome measurements in AD-related  
79 clinical trials [5-7]. For example, there is a 10-15% misdiagnosis rate when AD is diagnosed on  
80 clinical grounds only. This high rate of misdiagnosis has substantial cost implications [8-11] and  
81 if such misdiagnosed subjects are enrolled into clinical trials, they could obscure the impact of  
82 disease-modifying therapy. In addition, prediction of clinical decline in subjects with early-stage  
83 disease will permit the institution of aggressive interventions, such as physical exercise or  
84 pharmacologic therapy, to stave off AD symptoms. Finally, novel biomarkers or combinations of  
85 biomarkers could be used to enrich MCI clinical trials with subjects with high conversion rates to  
86 shorten and diminish the cost of clinical trials [12, 13]. Therefore, a better understanding of how  
87 biomarkers delineate disease classes and predict progression is needed.

88  
89 Recently, our group and others have identified a group of novel plasma and cerebrospinal fluid  
90 (CSF) biomarkers that fall outside the traditional  $A\beta$  cascade. Many of these markers have been  
91 shown to be useful in the prediction of MCI to AD conversion [14-20]. For example, we used a

92 hypothesis-free bioinformatics approach to identify a panel of 16 peptides in CSF initially  
93 identified as showing high diagnostic accuracy for AD vs. control, that was highly predictive of  
94 conversion from mild cognitive impairment (MCI) to AD in an independent group of subjects  
95 and outperformed conventional CSF markers such as A $\beta$ , tau derivatives and their ratios [20].  
96 These studies highlight non-canonical pathological cascades that may both provide useful tools  
97 for clinical practice and clinical trials purposes, and may also reveal new insights about disease  
98 mechanisms underlying AD.

99

100 One of the peptides identified using this hypothesis-free approach to separate AD from normal  
101 (NL) controls was VGF [20]. VGF (a non-initialism) has recently received significant attention  
102 because of its role in learning and memory and potential role in the pathophysiology of AD [21,  
103 22]. VGF is a neurotrophin-inducible 615-amino acid polypeptide secreted by neurons and is  
104 cleaved into multiple smaller fragments ranging in length from 16-129 amino acids. VGF is  
105 produced in a number of brain regions, including the cerebral cortex, amygdala, hippocampus  
106 and hypothalamus, as well as in neuroendocrine tissues such as the adrenal medulla and  
107 adenohypophysis, and is thought to be involved in synaptogenesis and energy homeostasis [23,  
108 24]. We and others have observed altered levels of VGF in the CSF of AD patients compared to  
109 controls, though not all studies had the same directionality (studies showing a decrease: [25-31],  
110 study showing an increase: [32]). VGF overexpression also protects against memory impairment  
111 in 5xFAD transgenic mice that model AD [21]. However, previous work has not yet examined  
112 the potential for VGF in the CSF, when combined with established biomarkers, to predict MCI to  
113 AD conversion. It should not be assumed that VGF independently contributes to the prediction  
114 of MCI to AD conversion: it is possible that it is a redundant marker for a process already  
115 encoded by changes in a more conventional biomarker.

116

117 Therefore, in the current study, we examined the potential for VGF in the CSF, when combined  
118 with conventional biomarkers of CSF A $\beta$ 1-42, total tau (tTau) and pTau-181 and hippocampal  
119 volume, to enhance the diagnostic and prognostic accuracy of these markers. The focus of this  
120 work is on the VGF peptide fragment with sequence NSEPQDEGELFQGVDP (‘‘VGF.NSEP’’)  
121 since it previously emerged as a strong predictor in a panel of peptides that predict MCI to AD  
122 conversion [20], though other VGF peptide fragments are also examined. Unlike our previous

123 studies involving hypothesis-free approaches to identify optimal peptides to include in biomarker  
124 signatures [20, 33, 34], the current study was focused on the utility of VGF. Using data from two  
125 independent groups in the ADNI cohort: one group of AD and control subjects and a separate  
126 group of MCI subjects, it was found that VGF, when combined with conventional biomarkers,  
127 enhanced both the diagnostic accuracy of these markers and the ability of these markers to  
128 predict MCI to AD conversion.

129

## 130 **Methods**

131 Methods and data used for this research are similar to those used in Devanarayan et al. [33]. The  
132 ADNI database ([adni.loni.usc.edu](http://adni.loni.usc.edu)) utilized in this research was launched in 2003 as a public-  
133 private partnership, led by Principal Investigator Michael W. Weiner, MD. The primary goal of  
134 ADNI has been to test whether serial MRI, PET, other biological markers, and clinical and  
135 neuropsychological assessments can be combined to measure the progression of MCI and early  
136 AD. For up-to-date information, see [www.adni-info.org](http://www.adni-info.org). This study was conducted across  
137 multiple clinical sites and was approved by the Institutional Review Boards of all of the  
138 participating institutions. Informed written consent was obtained from all participants at each  
139 site. Data used for the analyses presented here were accessed on February 24, 2018. Although the  
140 ADNI database continues to be updated on an ongoing basis, most newly added biomarker data  
141 are from later time points (i.e., beyond 1 year), in contrast to the baseline data used in this study.

142

### 143 **Subjects:**

144 This research was focused on the relationship between VGF, conventional biomarkers (CSF  
145 amyloid/tau and MRI hippocampal volume [HV]) and therefore, only those subjects whose  
146 values for these markers were available at baseline were included in this study. Ultimately, this  
147 dataset included 287 subjects across the three diagnostic categories (AD, MCI and NL). NL  
148 subjects were defined as those without memory complaints and had a clinical dementia rating  
149 (CDR) score of 0. MCI subjects had CDR scores of 0.5, had an abnormal score on Wechsler  
150 Memory Scale Revised- Logical Memory II and did not have significant functional impairment.  
151 AD subjects had functional decline and a CDR score of 0.5 or 1.0.

152

### 153 **Hippocampal volume:**

154 HV was chosen given its robust ability to predict MCI to AD conversion [35, 36] and its  
155 incorporation into proposed schema to classify AD subjects [37]. HV was obtained from MRI  
156 scans (mostly 1.5T; 25% in this dataset had 3.0T scans) and was computed using FreeSurfer  
157 software. Please see “UCSF FreeSurfer Methods” PDF document under “MR Image Analysis” in  
158 the ADNI section of <https://ida.loni.usc.edu/> for details as well as [38-40].

159

### 160 **CSF Samples:**

161 Innogenetics’ INNO-BIA AlzBio3 immunoassay on a Luminex xMAP platform (see [41] for  
162 details) was used to measure levels of the conventional biomarkers A $\beta$ 1-42, tTau, and pTau-181  
163 in CSF. The Caprion Proteomics mass spectrometry platform was used to measure levels of  
164 individual peptides. The VGF peptides (sequence NSEPQDEGELFQGVDPR, referred to here as  
165 VGF.NSEP, sequence AYQGVAAPFPK, referred to here as VGF.AYQG and sequence  
166 THLGEALEPLSK, referred to here as VGF.THLG) used in this study were among a total of 320  
167 peptides generated from tryptic digests of 143 proteins. Details regarding the measurements of  
168 these peptides can be found in the Use of Targeted Mass Spectrometry Proteomic Strategies to  
169 Identify CSF-Based Biomarkers in Alzheimer’s Disease Data Primer (found under Biomarkers  
170 Consortium CSF Proteomics MRM Data Primer at [ida.loni.usc.edu](http://ida.loni.usc.edu)) and in [19].

171

### 172 **Statistical Methods:**

173 As we have described previously [33], optimal combinatorial signatures including CSF A $\beta$ 1-42,  
174 tTau, pTau-181, their ratios, HV and VGF-derived peptides with simple decision thresholds for  
175 each marker were first identified from the AD and NL subjects. These signatures were revealed  
176 by an unbiased, data-driven manner via regression and tree-based computational algorithms  
177 called Patient Rule Induction Method [42] and Sequential BATTing [43]. To measure the  
178 performance of each signature for disease-state differentiation (i.e., NL vs. AD), five-fold cross-  
179 validation was performed. To do this, the data were randomly divided into five subgroups,  
180 referred to as folds, and a signature was derived from the remaining four folds. This signature  
181 was then tested on the left-out fold. This process was repeated for 10 iterations and median  
182 performance of each performance of positive predictive value (PPV), negative predictive value  
183 (NPV) and accuracy was computed.

184

185 Once an optimal signature for differentiating NL from AD was derived, it was tested on a  
186 different group of 135 MCI subjects from the ADNI dataset. Baseline values for A $\beta$ 1-42, tTau,  
187 pTau-181, HV and VGF peptides for each MCI subject at baseline were used to classify each  
188 subject as being “signature positive” (i.e., similar to the profile found in AD) or “signature  
189 negative” (i.e., similar to the profile found in NC). PPV, NPV and accuracy were then computed  
190 by comparing the actual outcome (conversion or not to AD over 36 months) to the predicted  
191 outcome (signature positive/negative which would predict conversion/nonconversion,  
192 respectively). Exact McNemar’s test was used to compare PPV, NPV and accuracy.

193

194 In addition to measuring the performance of whether MCI subjects would convert over 36  
195 months, time to conversion was also computed using available data up to 10 years after the initial  
196 evaluation. Potential markers for this analysis were grouped into categories:

197

- 198 1. Demographic markers (presence of APO-E4 allele, age, gender, education)
- 199 2. Demographic markers + HV
- 200 3. Demographic markers + amyloid/tau CSF markers (heretofore called “AT”: A $\beta$ 1-42,  
201 tTau, pTau-181, ratios of tTau to A $\beta$ 1-42 & pTau-181 to A $\beta$ 1-42)
- 202 4. Demographic markers + HV + AT
- 203 5. Demographic markers + HV + AT + VGF

204

205 All analyses related to predictive modeling and signature derivation were carried out using R  
206 (<http://www.R-project.org>), version 3.4.1, with the publicly available package, SubgrpID [43].

207 The time to progression analysis of the derived signatures and related assessments were carried  
208 out using JMP®, version 13.2.

209

## 210 **Results:**

### 211 *Demographics:*

212 Similar to Devanarayan et al. (2019), 66 AD, 135 MCI and 86 NL subjects were included in the  
213 analysis and their demographic information and rates of conversion from MCI to AD are shown  
214 in Table 1. There were no statistically significant differences in terms of age or education (range  
215 of means = 75.1 to 75.8 years,  $p > 0.05$ ) and education (range of means = 15.1 to 16 years,

216  $p > 0.05$ ). There was a greater number of males than females (59.1 vs 40.9%), though their  
217 likelihood of conversion from MCI to AD over 36 months was similar (43.5% vs. 53.9%,  
218  $p = 0.285$ , Chi-squared test). The likelihood that an APO-E4 allele was present was higher AD  
219 than in other subjects (present in 71.2% AD, 50% MCI and 24.4% NL subjects,  $p < 0.0001$ , Chi-  
220 squared test) and was a relatively weak risk factor for the conversion of MCI to AD (present in  
221 40/62 converters and 31/70 non-converters  $p = 0.03$ , Chi-squared test), both of which have been  
222 demonstrated previously [44-46].

223

#### 224 *Disease state classification – univariate analysis:*

225 Figures 1A-D recapitulates previous analyses by us and others [33, 47-49] showing that A $\beta$ 1-42,  
226 tTau, pTau-181 and HV are all significantly different in NL and AD subjects and that these  
227 values are intermediate for MCI subjects. For all four markers in Figures 1A-D, comparisons of  
228 the means between NL and AD groups reveal highly significant differences ( $p < 0.0001$  in all  
229 cases). However, it should be noted that there is substantial overlap between the distributions in  
230 each diagnostic category, rendering these biomarkers unsuitable for use in isolation for  
231 diagnostic categorization. As shown in Figures 1E-F, CSF VGF.NSEP levels are depressed in  
232 AD patients compared to NL subjects ( $p = 0.0002$ ) and lower levels at baseline are found in future  
233 MCI-AD converters than nonconverters ( $p = 0.032$ ).

234

#### 235 *Disease state classification – multivariate analysis:*

236 To determine if combinations of conventional biomarkers +/- the VGF.NSEP peptide are useful  
237 in disease-state classification, data-driven algorithms were used to derive the optimal signature  
238 that distinguished NL, MCI and AD. The performances of these signatures are summarized in  
239 Table 2. The signatures are grouped into six different categories, as described in the Methods  
240 section, and took relatively simple forms. The best performing signature for disease-state  
241 classification was a combination of HV + APO-E4 status, with an accuracy of 79.6%. Adding  
242 conventional CSF markers (A $\beta$ 1-42, tTau and pTau-181 and their ratios) did not enhance this  
243 value (accuracy = 76.3%), nor did the addition of VGF.NSEP peptide (accuracy = 75.7%).

244

#### 245 *Prediction of the likelihood of MCI to AD progression:*



246 As described above, for disease state classification, no advantage was found when adding the  
247 VGF.NSEP peptide to the conventional markers (overall accuracy of 76.3% vs. 75.7%,  $p > 0.05$ ).  
248 However, the combined biomarkers signature (HV+AT+VGF) significantly outperformed  
249 conventional biomarkers (HV+AT) for the prediction of MCI to AD conversion over 36 months  
250 ( $p=0.00013$ ). Most of the impact of the addition of VGF was in increasing the NPV (from 70.2%  
251 to 79.2%,  $p<0.0001$ ) while the impact on PPV was more modest (60.2% to 62.1%,  $p=0.008$ ).  
252 The signature derived from the conventional and novel markers took a simple form based on  
253 only a few markers, with a cut-point on each of them; HV  $< 7.81 \text{ cm}^3$ , pTau  $< 16.18 \text{ pg/mL}$ , ratio  
254 of tTau to A $\beta$ 1-42  $> 0.29$  and VGF.NSEP peptide  $< 20.39$  intensity units. Thus, the addition of a  
255 novel VGF peptide to the conventional AD markers provides a simple biomarker that improves  
256 the prediction of 36-month disease progression in MCI subjects at baseline.

257

#### 258 *Prediction of time to AD progression from MCI:*

259 Using available information containing 3-10 year follow-up clinical data, future time to  
260 progression was computed using the optimal signatures defined above. Table 3 includes a  
261 summary of the median times to progression of the signature negative and signature positive  
262 subjects and the overall hazard ratios with 95% confidence intervals. All groups containing  
263 conventional biomarkers (combinations of CSF amyloid/tau, HV and APO-E4 status) had similar  
264 times to progression (range for 2<sup>nd</sup> quartile or median = 25.7-31.5 months for signature positive  
265 subjects) and hazard ratios (range = 1.9-2.2). By comparison, the signature containing  
266 VGF.NSEP + conventional markers performed considerably better with median time to  
267 progression of 24.1 months and 96.2 months for the signature positive and signature negative  
268 groups respectively, and hazard ratio of 3.9. This difference in hazard ratio is illustrated in  
269 Figure 2A (without VGF) and Figure 2B (with VGF), where Kaplan-Meier curves demonstrate  
270 time to progression profiles of the signature positive versus signature negative MCI subjects at  
271 baseline. The increased separation of the time to progression curves in Figure 2B (with VGF)  
272 demonstrates the faster progression experienced by the MCI subjects meeting this signature  
273 criterion at baseline.

274

#### 275 *Studies of VGF peptide:*

276 In further evaluation of the VGF.NSEP peptide, we find that its levels are significantly correlated  
277 with pTau-181 and tTau in NL, MCI and AD subjects, and not significantly correlated with A $\beta$ 1-  
278 42 and brain HV in any of the three groups (see Figures 3A-D). To determine if the impact of  
279 VGF was isolated to the particular peptide fragment (VGF.NSEP) that emerged from the  
280 multivariate analysis in Llano et al (2017), the other two VGF peptides (AYQGVAAPFPK,  
281 referred to as VGF.AYQG and THLGELAPLSK, referred to as VGF.THLG) in this 320-  
282 peptide MRM panel were also assessed. The pairwise correlations are over 97% between the  
283 three VGF peptides (Figure 4), and therefore as expected, the other two VGF peptides have very  
284 similar effects across the disease states (NL vs. AD significant with  $p < 0.05$ ) and significantly  
285 different ( $p < 0.05$ ) between the stable and progressive MCI groups (Figures 5 A-D). When  
286 replacing the VGF.NSEP peptide by each of these other two peptides one at a time, the  
287 performance of the combined signature for the HV+AT+VGF scenario was quite similar in terms  
288 of the median time to progression of MCI subjects to AD (see Table 4 and Figure 6). However,  
289 the differences were greater in the overall time course of progression that resulted in larger  
290 hazard ratios (4.1 and 4.7). Thus, the considerable improvement we see in the prediction of MCI  
291 to AD progression by including VGF with the conventional markers is consistently evident for  
292 all three peptide fragments of VGF, and not isolated to a specific peptide fragment.

293

294

## Discussion

295

### *Summary:*

296

297

298

299

300

301

302

303

304

305

Here, we examined the ability of CSF VGF-derived peptides, in combination with conventional AD biomarkers (A $\beta$ 1-42, tTau, pTau-181, their ratios and HV) to serve as a disease-state marker to distinguish between AD and NLn subjects, and to predict conversion from MCI to AD in a separate group of subjects. We observed that CSF levels of a VGF peptide, on its own, are lower in AD subjects than NLs and that lower levels predict MCI to AD conversion. When combined with conventional biomarkers, the VGF peptide significantly increased the ability of a combination of conventional biomarkers to predict MCI to AD conversion, with the hazard ratio increasing from 2.2 to 3.9. These data suggest that VGF may play a previously under-recognized role in the pathophysiology of AD and that CSF VGF may be useful to help predict MCI to AD conversion.

306 *Total tau vs. phosphorylated tau in predicting MCI to AD conversion:*

307 It is notable that, when combined with HV, A $\beta$ 1-42 and VGF.NSEP, CSF tTau was found to  
308 more strongly predict MCI to AD conversion than pTau-181. tTau, but not pTau-181, elevations  
309 in the CSF have been observed in many non-AD conditions involving neuronal injury, including  
310 stroke, traumatic brain injury, Creutzfeldt-Jacob disease, multiple sclerosis as well as vascular  
311 dementia [50-55], suggesting that tTau is a general marker of neuronal injury, while pTau-181  
312 better reflects AD pathology. The finding in the current study that tTau is more strongly  
313 predictive of MCI-AD conversion than pTau-181 is consistent with previous data showing that  
314 total tau is more predictive than pTau-181 in predicting subsequent cognitive decline in MCI and  
315 AD [56, 57]. These findings suggest that while pTau-181 may be more useful as a disease-state  
316 marker, particularly when making a differential diagnosis, that tTau may be a better marker of  
317 disease activity and thus the current rate of clinical decline. In addition, because the database we  
318 used only captures the progression to AD of these MCI subjects, and not the other  
319 neurodegenerative diseases, is likely that the use of pTau-181 instead of tTau in our signature  
320 may have shown improved performance specificity if we had applied it to a broader group of  
321 MCI subjects that also experienced progression to the other forms of dementia.

322 *VGF and AD:*

323 The current finding that all peptides associated with VGF are diminished in the CSF of AD  
324 patients compared to controls is consistent with multiple previous studies comparing VGF  
325 peptide or protein levels in CSF [26-30, 32] and brain tissue (parietal cortex [22]) from AD and  
326 control subjects. The functional significance of this decrease is not yet clear but may relate to  
327 VGF's potential role in synaptic plasticity and/or neuronal metabolism. VGF is found widely  
328 throughout the brain, including areas highly affected in AD such as cerebral cortex,  
329 hippocampus, entorhinal cortex, basal forebrain, amygdala, and brainstem [22, 58, 59]. Its  
330 expression is upregulated by neuronal activity [60] and can be induced by neuronal growth  
331 factors such as brain-derived neurotrophic factor (BDNF [58, 61]). In animal models, VGF has  
332 been shown to be important for the mediation of synaptic plasticity and neurogenesis in the  
333 hippocampus [58, 61-63], and knock out of this gene has been shown to cause significant  
334 anorexia [64], while overexpression may protect the brain against AD-related pathology [21].

335 These functions align well with the loss of hippocampal function and significant anorexia seen in  
336 AD [65, 66].

337 The mechanism behind the drop in VGF levels in AD CSF is not yet clear. Given the parallel  
338 drop in the cerebral cortex [22], low levels in the CSF are likely not due to a shift of VGF from  
339 CSF to parenchyma, as has been hypothesized for the low levels of A $\beta$  in the CSF of AD patients  
340 [67]. Low levels of VGF in CSF (and brain) may suggest that VGF is a general marker for  
341 neuronal loss, consistent the drop in CSF VGF in frontotemporal dementia [68], as such,  
342 potentially putting VGF into the “neurodegenerative/neuronal injury” class of biomarkers in the  
343 AT(N) framework previously described [69]. This notion that low CSF VGF may be a reflection  
344 of neuronal damage is consistent with the current data which demonstrate that VGF levels are  
345 correlated with hippocampal volume as well as tTau and pTau-181 levels (Figure 3). Future  
346 work examining VGF across other states of neuronal injury may help to add clarity to this issue.

347 One previous study observed borderline elevations of VGF in the CSF of MCI compared to  
348 control and AD subjects, and that VGF elevations in MCI subjects predicted later conversion to  
349 AD [32]. Such transient elevations are reminiscent of “pseudonormalization” of other biomarkers  
350 whose values in MCI appear to change in the opposite direction of that seen in AD [20, 34, 70].  
351 It is not clear from the Duits et al. report which specific peptides were elevated in MCI, though  
352 the two peptides examined in their study (NSEPQDEGELFQGVDPR and AYQGVAAPFPK)  
353 matched two of the three peptides in the current study, all of which showed decreases in MCI  
354 and AD (Figure 5). The source of the apparent discrepancy is not yet clear, though we note that  
355 all analytes, not just VGF, in the Duits et al. study showed elevations in the MCI group. It is  
356 notable that other analytes that are elevated in MCI subjects in the Duits et al. study such as  
357 Chromogranin A have been found to be unchanged in other studies [71] or, in the case of VGF,  
358 decreased in MCI patients that convert to AD [27], suggesting a more general difference in the  
359 databases or the analytical methodologies used between the Duits et al. study and other studies.

360 *Implications of the prediction of MCI-AD conversion:*

361 CSF A $\beta$ 1-42 and tau derivatives as biomarkers are well-established for the prediction of clinical  
362 decline in MCI [72-76] (for meta-analyses see [77, 78]). In addition, predictive accuracy of these  
363 markers increases when they are combined with volumetric imaging markers [79-83]. Both of

364 these findings were reproduced in the current study (Table 2). In addition, recently a number of  
365 non-A $\beta$ , non-tau CSF markers have been found, often using proteomic approaches, that separate  
366 AD from NL subjects, and these markers have been implicated across a number of metabolic,  
367 inflammatory and synaptic physiology pathways [25-29, 31, 84-90]. A small number have also  
368 shown the ability to predict MCI to AD conversion. For example, heart fatty acid binding  
369 protein, chemokine receptor 2, neurogranin, calbindin, IL-1, thymus-expressed chemokine have  
370 all individually been shown to predict MCI to AD progression [14-20]. In addition, we and  
371 others identified panels of peptides that predict MCI to AD progression [19, 20]. These data  
372 point to a range of potential pathophysiological mechanisms implicated in AD outside of the  
373 classical amyloid-driven cascade. It will be important to replicate the findings in this study as  
374 well as others in independent cohorts. In addition, like most of the previous work, the current  
375 study did not examine non-AD dementia or other neurologic disease. This absence is particularly  
376 important in the current study which shows VGF levels that correlate with tTau levels (a marker  
377 of neurodegeneration, as described above) but not hippocampal volume (Figures 3C and D).  
378 These data suggest that VGF levels may correlate with a more general neurodegenerative  
379 phenotype. Therefore, it will be important in future studies to include non-AD dementias as well  
380 as other neurological illness such as stroke or encephalitis, to determine the specificity of VGF as  
381 a biomarker for AD and predictor of MCI to AD progression.

382

383

#### Figure legends:

384

385 **Figure 1:** Distributions of biomarkers of in NL, MCI and AD subjects: A) HV, B) A $\beta$ 1-42, C)  
386 tTau, D) pTau-181, E) VGF.NSEP levels (shown in normalized and log2 transformed intensity  
387 units) and F) baseline VGF.NSEP levels in MCI to AD converters and stable MCI subjects over  
388 36 months. In A-E, for the MCI subjects, those that progressed to AD over 36 months are shown  
389 in red. The bottom and top ends of the box represent the first and third quartiles respectively,  
390 with the line inside the box representing the median. Lines extending out of the ends of the box  
391 indicate the range of the data, minus the outliers. The points outside the lines are the low and  
392 high outliers.

393

394 **Figure 2:** Time to progression profiles of the signature positive versus signature negative MCI  
395 subjects with the shaded 95% confidence intervals are shown here via Kaplan-Meier analysis.  
396 The effect of signature based on only the conventional markers (HV and AT) is illustrated in  
397 Figure 2A and the signature with both the conventional markers and the novel VGF.NSEP  
398 peptide from the MRM panel is shown in Figure 2B. Patients meeting the signature criterion that  
399 includes the VGF.NSEP peptide experience 3.9-fold faster progression to AD (hazard ratio =  
400 3.9), relative to the 2.2-fold faster progression without this peptide.

401  
402 **Figure 3:** Correlation of the VGF.NSEP peptide levels (shown in normalized and log<sub>2</sub>  
403 transformed intensity units) versus conventional markers of AD, brain hippocampal volume HV  
404 (A), Aβ<sub>1-42</sub> (B), pTau-181 (C), and tTau (D), with the least squares regression lines overlaid on  
405 individual subject results from the three groups; Normal (in green), MCI (in blue) and AD (in  
406 red). The rank correlation values for each of the groups are shown, with \* representing  
407 significant correlations ( $p < 0.05$ ).

408  
409 **Figure 4:** Scatterplot matrix with rank correlation values overlaid for the three VGF peptides  
410 levels (shown in normalized and log<sub>2</sub> transformed intensity units) from the 320-peptide MRM  
411 panel for all subjects.

412  
413 **Figure 5: A)** Distribution of VGF.AYQG peptide (shown in normalized and log<sub>2</sub> transformed  
414 intensity units) is shown across the NL, MCI and AD groups, and **B)** among the baseline MCI  
415 subjects that either progressed to AD or remained stable over the next 36 months. **C)** Distribution  
416 of VGF.THLG peptide (shown in normalized and log<sub>2</sub> transformed intensity units) is shown  
417 across the NL, MCI and AD groups, and **D)** among the baseline MCI subjects that either  
418 progressed to AD or remained stable over the next 36 months.

419  
420 **Figure 6:** Time to progression profiles for the two additional VGF peptides + conventional  
421 biomarkers: (A) AT+HV+VGF.AYQG and (B) AT+HV+VGF.THLG. In both cases, the  
422 signature positive versus signature negative MCI subjects with the shaded 95% confidence  
423 intervals are shown via Kaplan-Meier analysis.

424

425 **References:**

- 426 1. Dubois, B., et al., *Preclinical Alzheimer's disease: definition, natural history, and*  
427 *diagnostic criteria*. *Alzheimer's & Dementia*, 2016. **12**(3): p. 292-323.
- 428 2. Bloom, G.S., *Amyloid- $\beta$  and tau: the trigger and bullet in Alzheimer disease*  
429 *pathogenesis*. *JAMA neurology*, 2014. **71**(4): p. 505-508.
- 430 3. Haass, C. and D.J. Selkoe, *Soluble protein oligomers in neurodegeneration: lessons from*  
431 *the Alzheimer's amyloid  $\beta$ -peptide*. *Nature reviews Molecular cell biology*, 2007. **8**(2): p.  
432 101.
- 433 4. Sengupta, U., A.N. Nilson, and R. Kaye, *The role of amyloid- $\beta$  oligomers in toxicity,*  
434 *propagation, and immunotherapy*. *EBioMedicine*, 2016. **6**: p. 42-49.
- 435 5. Blennow, K., et al., *Cerebrospinal fluid and plasma biomarkers in Alzheimer disease*.  
436 *Nature Reviews Neurology*, 2010. **6**(3): p. 131.
- 437 6. Perrin, R.J., A.M. Fagan, and D.M. Holtzman, *Multimodal techniques for diagnosis and*  
438 *prognosis of Alzheimer's disease*. *Nature*, 2009. **461**(7266): p. 916.
- 439 7. Dubois, B., et al., *Research criteria for the diagnosis of Alzheimer's disease: revising the*  
440 *NINCDS-ADRDA criteria*. *The Lancet Neurology*, 2007. **6**(8): p. 734-746.
- 441 8. Rasmusson, D., et al., *Accuracy of clinical diagnosis of Alzheimer disease and clinical*  
442 *features of patients with non-Alzheimer disease neuropathology*. *Alzheimer disease and*  
443 *associated disorders*, 1996. **10**(4): p. 180-188.
- 444 9. Kirson, N., et al., *Excess costs associated with misdiagnosis of Alzheimer's disease*  
445 *among US Medicare beneficiaries with vascular dementia or Parkinson's disease*.  
446 *Alzheimer's & Dementia: The Journal of the Alzheimer's Association*, 2013. **9**(4): p.  
447 P845-P846.
- 448 10. Beach, T.G., et al., *Accuracy of the clinical diagnosis of Alzheimer disease at National*  
449 *Institute on Aging Alzheimer Disease Centers, 2005–2010*. *Journal of neuropathology and*  
450 *experimental neurology*, 2012. **71**(4): p. 266-273.
- 451 11. Qian, W., et al., *Misdiagnosis of Alzheimer's disease: Inconsistencies between clinical*  
452 *diagnosis and neuropathological confirmation*. *Alzheimer's & Dementia: The Journal of*  
453 *the Alzheimer's Association*, 2016. **12**(7): p. P293.
- 454 12. Yu, P., et al., *Enriching amnesic mild cognitive impairment populations for clinical*  
455 *trials: optimal combination of biomarkers to predict conversion to dementia*. *Journal of*  
456 *Alzheimer's disease*, 2012. **32**(2): p. 373-385.
- 457 13. van Rossum, I.A., et al., *Biomarkers as predictors for conversion from mild cognitive*  
458 *impairment to Alzheimer-type dementia: implications for trial design*. *Journal of*  
459 *Alzheimer's Disease*, 2010. **20**(3): p. 881-891.
- 460 14. Westin, K., et al., *CCL2 is associated with a faster rate of cognitive decline during early*  
461 *stages of Alzheimer's disease*. *PloS one*, 2012. **7**(1): p. e30525.
- 462 15. Chiasserini, D., et al., *CSF levels of heart fatty acid binding protein are altered during*  
463 *early phases of Alzheimer's disease*. *Journal of Alzheimer's Disease*, 2010. **22**(4): p.  
464 1281-1288.
- 465 16. Olsson, B., et al., *Cerebrospinal fluid levels of heart fatty acid binding protein are*  
466 *elevated prodromally in Alzheimer's disease and vascular dementia*. *Journal of*  
467 *Alzheimer's Disease*, 2013. **34**(3): p. 673-679.
- 468 17. Kester, M.I., et al., *Neurogranin as a cerebrospinal fluid biomarker for synaptic loss in*  
469 *symptomatic Alzheimer disease*. *JAMA neurology*, 2015. **72**(11): p. 1275-1280.

- 470 18. Craig-Schapiro, R., et al., *Multiplexed immunoassay panel identifies novel CSF*  
471 *biomarkers for Alzheimer's disease diagnosis and prognosis*. PloS one, 2011. **6**(4): p.  
472 e18850.
- 473 19. Spellman, D.S., et al., *Development and evaluation of a multiplexed mass spectrometry*  
474 *based assay for measuring candidate peptide biomarkers in Alzheimer's Disease*  
475 *Neuroimaging Initiative (ADNI) CSF*. Proteomics-Clinical Applications, 2015.
- 476 20. Llano, D.A., et al., *A multivariate predictive modeling approach reveals a novel CSF*  
477 *peptide signature for both Alzheimer's Disease state classification and for predicting*  
478 *future disease progression*. PloS one, 2017. **12**(8): p. e0182098.
- 479 21. Beckmann, N.D., et al., *Multiscale causal network models of Alzheimer's disease identify*  
480 *VGF as a key regulator of disease*. bioRxiv, 2018.
- 481 22. Cocco, C., et al., *Distribution of VGF peptides in the human cortex and their selective*  
482 *changes in Parkinson's and Alzheimer's diseases*. Journal of anatomy, 2010. **217**(6): p.  
483 683-693.
- 484 23. Levi, A., et al., *Processing, distribution, and function of VGF, a neuronal and endocrine*  
485 *peptide precursor*. Cellular and molecular neurobiology, 2004. **24**(4): p. 517-533.
- 486 24. Salton, S.R., et al., *VGF: a novel role for this neuronal and neuroendocrine polypeptide*  
487 *in the regulation of energy balance*. Frontiers in neuroendocrinology, 2000. **21**(3): p.  
488 199-219.
- 489 25. Wijte, D., et al., *A novel peptidomics approach to detect markers of Alzheimer's disease*  
490 *in cerebrospinal fluid*. Methods, 2012. **56**(4): p. 500-507.
- 491 26. Hendrickson, R.C., et al., *High resolution discovery proteomics reveals candidate disease*  
492 *progression markers of Alzheimer's disease in human cerebrospinal fluid*. PloS one,  
493 2015. **10**(8): p. e0135365.
- 494 27. Jahn, H., et al., *Peptide fingerprinting of Alzheimer's disease in cerebrospinal fluid:*  
495 *identification and prospective evaluation of new synaptic biomarkers*. PloS one, 2011.  
496 **6**(10): p. e26540.
- 497 28. Selle, H., et al., *Identification of novel biomarker candidates by differential peptidomics*  
498 *analysis of cerebrospinal fluid in Alzheimer's disease*. Combinatorial chemistry & high  
499 throughput screening, 2005. **8**(8): p. 801-806.
- 500 29. Hölttä, M., et al., *An Integrated Workflow for Multiplex CSF Proteomics and*  
501 *Peptidomics • Identification of Candidate Cerebrospinal Fluid Biomarkers of*  
502 *Alzheimer's Disease*. Journal of proteome research, 2014. **14**(2): p. 654-663.
- 503 30. Carrette, O., et al., *A panel of cerebrospinal fluid potential biomarkers for the diagnosis*  
504 *of Alzheimer's disease*. PROTEOMICS: International Edition, 2003. **3**(8): p. 1486-1494.
- 505 31. Brinkmalm, G., et al., *A parallel reaction monitoring mass spectrometric method for*  
506 *analysis of potential CSF biomarkers for Alzheimer's disease*. PROTEOMICS–Clinical  
507 Applications, 2018. **12**(1): p. 1700131.
- 508 32. Duits, F.H., et al., *Synaptic proteins in CSF as potential novel biomarkers for prognosis*  
509 *in prodromal Alzheimer's disease*. Alzheimer's research & therapy, 2018. **10**(1): p. 5.
- 510 33. Devanarayan, P., et al., *Identification of a simple and novel cut-point based CSF and MRI*  
511 *signature for predicting Alzheimer's disease progression that reinforces the 2018 NIA-*  
512 *AA research framework* Journal of Alzheimer's Disease, 2019. **In Press**.
- 513 34. Llano, D.A., et al., *Evaluation of plasma proteomic data for Alzheimer disease state*  
514 *classification and for the prediction of progression from mild cognitive impairment to*  
515 *Alzheimer disease*. Alzheimer Disease & Associated Disorders, 2013. **27**(3): p. 233-243.



- 516 35. Jack, C.R., et al., *Prediction of AD with MRI-based hippocampal volume in mild*  
517 *cognitive impairment*. *Neurology*, 1999. **52**(7): p. 1397-1397.
- 518 36. Risacher, S.L., et al., *Baseline MRI predictors of conversion from MCI to probable AD in*  
519 *the ADNI cohort*. *Current Alzheimer Research*, 2009. **6**(4): p. 347-361.
- 520 37. Dubois, B., et al., *Revising the definition of Alzheimer's disease: a new lexicon*. *The*  
521 *Lancet Neurology*, 2010. **9**(11): p. 1118-1127.
- 522 38. Dale, A.M., B. Fischl, and M.I. Sereno, *Cortical surface-based analysis: I. Segmentation*  
523 *and surface reconstruction*. *Neuroimage*, 1999. **9**(2): p. 179-194.
- 524 39. Fischl, B., M.I. Sereno, and A.M. Dale, *Cortical surface-based analysis: II: inflation,*  
525 *flattening, and a surface-based coordinate system*. *Neuroimage*, 1999. **9**(2): p. 195-207.
- 526 40. Fischl, B., et al., *High-resolution intersubject averaging and a coordinate system for the*  
527 *cortical surface*. *Human brain mapping*, 1999. **8**(4): p. 272-284.
- 528 41. Shaw, L.M., et al., *Cerebrospinal fluid biomarker signature in Alzheimer's disease*  
529 *neuroimaging initiative subjects*. *Annals of neurology*, 2009. **65**(4): p. 403-413.
- 530 42. Chen, G., et al., *A PRIM approach to predictive-signature development for patient*  
531 *stratification*. *Statistics in medicine*, 2015. **34**(2): p. 317-342.
- 532 43. Huang, X., et al., *Patient subgroup identification for clinical drug development*. *Statistics*  
533 *in medicine*, 2017. **36**(9): p. 1414-1428.
- 534 44. Corder, E., et al., *Gene dose of apolipoprotein E type 4 allele and the risk of Alzheimer's*  
535 *disease in late onset families*. *Science*, 1993. **261**(5123): p. 921-923.
- 536 45. Drzezga, A., et al., *Prediction of individual clinical outcome in MCI by means of genetic*  
537 *assessment and 18F-FDG PET*. *Journal of Nuclear Medicine*, 2005. **46**(10): p. 1625-  
538 1632.
- 539 46. Lindsay, J., et al., *Risk factors for Alzheimer's disease: a prospective analysis from the*  
540 *Canadian Study of Health and Aging*. *American journal of epidemiology*, 2002. **156**(5):  
541 p. 445-453.
- 542 47. Galasko, D., et al., *High cerebrospinal fluid tau and low amyloid  $\beta$ 42 levels in the*  
543 *clinical diagnosis of Alzheimer disease and relation to apolipoprotein E genotype*.  
544 *Archives of neurology*, 1998. **55**(7): p. 937-945.
- 545 48. Tapiola, T., et al., *Cerebrospinal fluid  $\beta$ -amyloid 42 and tau proteins as biomarkers of*  
546 *Alzheimer-type pathologic changes in the brain*. *Archives of neurology*, 2009. **66**(3): p.  
547 382-389.
- 548 49. Hampel, H., et al., *Value of CSF  $\beta$ -amyloid 1-42 and tau as predictors of Alzheimer's*  
549 *disease in patients with mild cognitive impairment*. *Molecular psychiatry*, 2004. **9**(7): p.  
550 705.
- 551 50. Satoh, K., et al., *14-3-3 protein, total tau and phosphorylated tau in cerebrospinal fluid*  
552 *of patients with Creutzfeldt-Jakob disease and neurodegenerative disease in Japan*.  
553 *Cellular and molecular neurobiology*, 2006. **26**(1): p. 45-52.
- 554 51. Nägga, K., et al., *Cerebrospinal fluid phospho-Tau, total Tau and  $\beta$ -Amyloid1-42 in the*  
555 *differentiation between Alzheimer's disease and vascular dementia*. *Dementia and*  
556 *geriatric cognitive disorders*, 2002. **14**(4): p. 183-190.
- 557 52. Kapaki, E., et al., *Cerebrospinal fluid tau, phospho-tau181 and  $\beta$ -amyloid1-42 in*  
558 *idiopathic normal pressure hydrocephalus: a discrimination from Alzheimer's disease*.  
559 *European journal of neurology*, 2007. **14**(2): p. 168-173.

- 560 53. Skillbäck, T., et al., *Diagnostic performance of cerebrospinal fluid total tau and*  
561 *phosphorylated tau in Creutzfeldt-Jakob disease: results from the Swedish Mortality*  
562 *Registry*. JAMA neurology, 2014. **71**(4): p. 476-483.
- 563 54. Hesse, C., et al., *Transient increase in total tau but not phospho-tau in human*  
564 *cerebrospinal fluid after acute stroke*. Neuroscience letters, 2001. **297**(3): p. 187-190.
- 565 55. Bartosik-Psujek, H. and Z. Stelmasiak, *The CSF levels of total-tau and phosphotau in*  
566 *patients with relapsing-remitting multiple sclerosis*. Journal of neural transmission, 2006.  
567 **113**(3): p. 339-345.
- 568 56. Sämgård, K., et al., *Cerebrospinal fluid total tau as a marker of Alzheimer's disease*  
569 *intensity*. International Journal of Geriatric Psychiatry: A journal of the psychiatry of late  
570 life and allied sciences, 2010. **25**(4): p. 403-410.
- 571 57. Blom, E.S., et al., *Rapid progression from mild cognitive impairment to Alzheimer's*  
572 *disease in subjects with elevated levels of tau in cerebrospinal fluid and the APOE  $\epsilon 4/\epsilon 4$*   
573 *genotype*. Dementia and geriatric cognitive disorders, 2009. **27**(5): p. 458-464.
- 574 58. Alder, J., et al., *Brain-derived neurotrophic factor-induced gene expression reveals novel*  
575 *actions of VGF in hippocampal synaptic plasticity*. Journal of Neuroscience, 2003.  
576 **23**(34): p. 10800-10808.
- 577 59. Snyder, S.E. and S.R. Salton, *Expression of VGF mRNA in the adult rat central nervous*  
578 *system*. Journal of Comparative Neurology, 1998. **394**(1): p. 91-105.
- 579 60. Snyder, S., et al., *The messenger RNA encoding VGF, a neuronal peptide precursor, is*  
580 *rapidly regulated in the rat central nervous system by neuronal activity, seizure and*  
581 *lesion*. Neuroscience, 1997. **82**(1): p. 7-19.
- 582 61. Thakker-Varia, S., et al., *The neuropeptide VGF produces antidepressant-like behavioral*  
583 *effects and enhances proliferation in the hippocampus*. Journal of Neuroscience, 2007.  
584 **27**(45): p. 12156-12167.
- 585 62. Bozdagi, O., et al., *The neurotrophin-inducible gene Vgf regulates hippocampal function*  
586 *and behavior through a brain-derived neurotrophic factor-dependent mechanism*. Journal  
587 of Neuroscience, 2008. **28**(39): p. 9857-9869.
- 588 63. Thakker-Varia, S., et al., *VGF (TLQP-62)-induced neurogenesis targets early phase*  
589 *neural progenitor cells in the adult hippocampus and requires glutamate and BDNF*  
590 *signaling*. Stem cell research, 2014. **12**(3): p. 762-777.
- 591 64. Hahm, S., et al., *Targeted deletion of the Vgf gene indicates that the encoded secretory*  
592 *peptide precursor plays a novel role in the regulation of energy balance*. Neuron, 1999.  
593 **23**(3): p. 537-548.
- 594 65. Gillette-Guyonnet, S., et al., *Weight loss in Alzheimer disease*. The American journal of  
595 clinical nutrition, 2000. **71**(2): p. 637S-642S.
- 596 66. Johnson, D.K., C.H. Wilkins, and J.C. Morris, *Accelerated weight loss may precede*  
597 *diagnosis in Alzheimer disease*. Archives of neurology, 2006. **63**(9): p. 1312-1317.
- 598 67. Motter, n., et al., *Reduction of  $\beta$ -amyloid peptide<sub>42</sub> in the cerebrospinal fluid of patients*  
599 *with Alzheimer's disease*. Annals of Neurology: Official Journal of the American  
600 Neurological Association and the Child Neurology Society, 1995. **38**(4): p. 643-648.
- 601 68. Rüetschi, U., et al., *Identification of CSF biomarkers for frontotemporal dementia using*  
602 *SELDI-TOF*. Experimental neurology, 2005. **196**(2): p. 273-281.
- 603 69. Jack, C.R., et al., *NIA-AA Research Framework: Toward a biological definition of*  
604 *Alzheimer's disease*. Alzheimer's & Dementia, 2018. **14**(4): p. 535-562.

- 605 70. Dickerson, B., et al., *Increased hippocampal activation in mild cognitive impairment*  
606 *compared to normal aging and AD*. *Neurology*, 2005. **65**(3): p. 404-11.
- 607 71. Perrin, R.J., et al., *Identification and validation of novel cerebrospinal fluid biomarkers*  
608 *for staging early Alzheimer's disease*. *PloS one*, 2011. **6**(1): p. e16032.
- 609 72. Hansson, O., et al., *Association between CSF biomarkers and incipient Alzheimer's*  
610 *disease in patients with mild cognitive impairment: a follow-up study*. *The Lancet*  
611 *Neurology*, 2006. **5**(3): p. 228-234.
- 612 73. Forlenza, O.V., et al., *Cerebrospinal fluid biomarkers in Alzheimer's disease: Diagnostic*  
613 *accuracy and prediction of dementia*. *Alzheimer's & Dementia: Diagnosis, Assessment &*  
614 *Disease Monitoring*, 2015. **1**(4): p. 455-463.
- 615 74. Zetterberg, H., L.-O. Wahlund, and K. Blennow, *Cerebrospinal fluid markers for*  
616 *prediction of Alzheimer's disease*. *Neuroscience letters*, 2003. **352**(1): p. 67-69.
- 617 75. Handels, R.L., et al., *Predicting progression to dementia in persons with mild cognitive*  
618 *impairment using cerebrospinal fluid markers*. *Alzheimer's & Dementia*, 2017. **13**(8): p.  
619 903-912.
- 620 76. Lanari, A. and L. Parnetti, *Cerebrospinal fluid biomarkers and prediction of conversion*  
621 *in patients with mild cognitive impairment: 4-year follow-up in a routine clinical setting*.  
622 *The Scientific World Journal*, 2009. **9**: p. 961-966.
- 623 77. Diniz, B.S., J.A. Pinto Jr, and O.V. Forlenza, *Do CSF total tau, phosphorylated tau, and*  
624  *$\beta$ -amyloid 42 help to predict progression of mild cognitive impairment to Alzheimer's*  
625 *disease? A systematic review and meta-analysis of the literature*. *The World Journal of*  
626 *Biological Psychiatry*, 2008. **9**(3): p. 172-182.
- 627 78. Mitchell, A.J., *CSF phosphorylated tau in the diagnosis and prognosis of mild cognitive*  
628 *impairment and Alzheimer's disease—a meta-analysis of 51 studies*. *Journal of Neurology,*  
629 *Neurosurgery & Psychiatry*, 2009.
- 630 79. Vemuri, P., et al., *MRI and CSF biomarkers in normal, MCI, and AD subjects: predicting*  
631 *future clinical change*. *Neurology*, 2009. **73**(4): p. 294-301.
- 632 80. Nesteruk, M., et al., *Combined use of biochemical and volumetric biomarkers to assess*  
633 *the risk of conversion of mild cognitive impairment to Alzheimer's disease*. *Folia*  
634 *neuropathologica*, 2016. **54**(4): p. 369-374.
- 635 81. Bouwman, F., et al., *CSF biomarkers and medial temporal lobe atrophy predict dementia*  
636 *in mild cognitive impairment*. *Neurobiology of aging*, 2007. **28**(7): p. 1070-1074.
- 637 82. Heister, D., et al., *Predicting MCI outcome with clinically available MRI and CSF*  
638 *biomarkers*. *Neurology*, 2011: p. WNL. 0b013e3182343314.
- 639 83. Westman, E., J.-S. Muehlboeck, and A. Simmons, *Combining MRI and CSF measures*  
640 *for classification of Alzheimer's disease and prediction of mild cognitive impairment*  
641 *conversion*. *Neuroimage*, 2012. **62**(1): p. 229-238.
- 642 84. Maarouf, C.L., et al., *Proteomic analysis of Alzheimer's disease cerebrospinal fluid from*  
643 *neuropathologically diagnosed subjects*. *Current Alzheimer research*, 2009. **6**(4): p. 399-  
644 406.
- 645 85. Oláh, Z., et al., *Proteomic analysis of cerebrospinal fluid in Alzheimer's disease: wanted*  
646 *dead or alive*. *Journal of Alzheimer's Disease*, 2015. **44**(4): p. 1303-1312.
- 647 86. Roher, A.E., et al., *Proteomics-derived cerebrospinal fluid markers of autopsy-confirmed*  
648 *Alzheimer's disease*. *Biomarkers*, 2009. **14**(7): p. 493-501.

- 649 87. Choi, Y.S., et al., *Targeted human cerebrospinal fluid proteomics for the validation of*  
650 *multiple Alzheimer's disease biomarker candidates*. *Journal of Chromatography B*, 2013.  
651 **930**: p. 129-135.
- 652 88. Wildsmith, K.R., et al., *Identification of longitudinally dynamic biomarkers in*  
653 *Alzheimer's disease cerebrospinal fluid by targeted proteomics*. *Molecular*  
654 *neurodegeneration*, 2014. **9**(1): p. 22.
- 655 89. Paterson, R., et al., *A targeted proteomic multiplex CSF assay identifies increased malate*  
656 *dehydrogenase and other neurodegenerative biomarkers in individuals with Alzheimer's*  
657 *disease pathology*. *Translational psychiatry*, 2016. **6**(11): p. e952.
- 658 90. Heywood, W.E., et al., *Identification of novel CSF biomarkers for neurodegeneration*  
659 *and their validation by a high-throughput multiplexed targeted proteomic assay*.  
660 *Molecular neurodegeneration*, 2015. **10**(1): p. 64.

661

662

663 Figure 1:

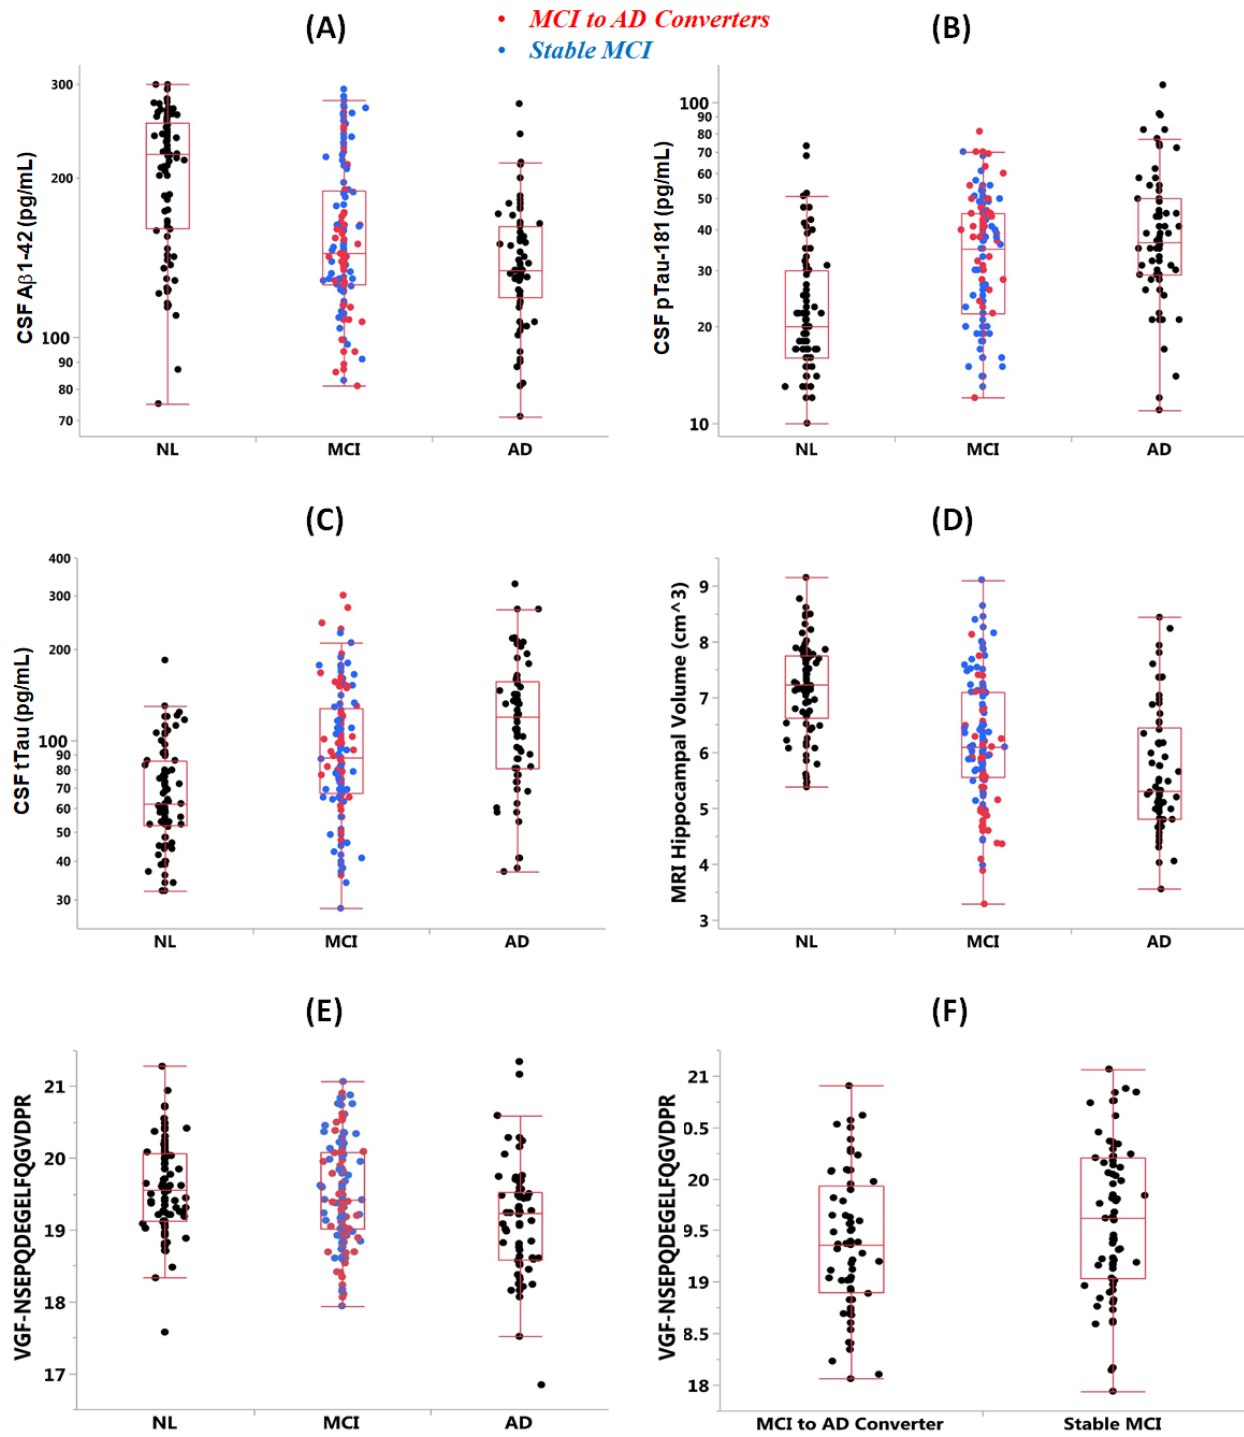

664

665

666 Figure 2:

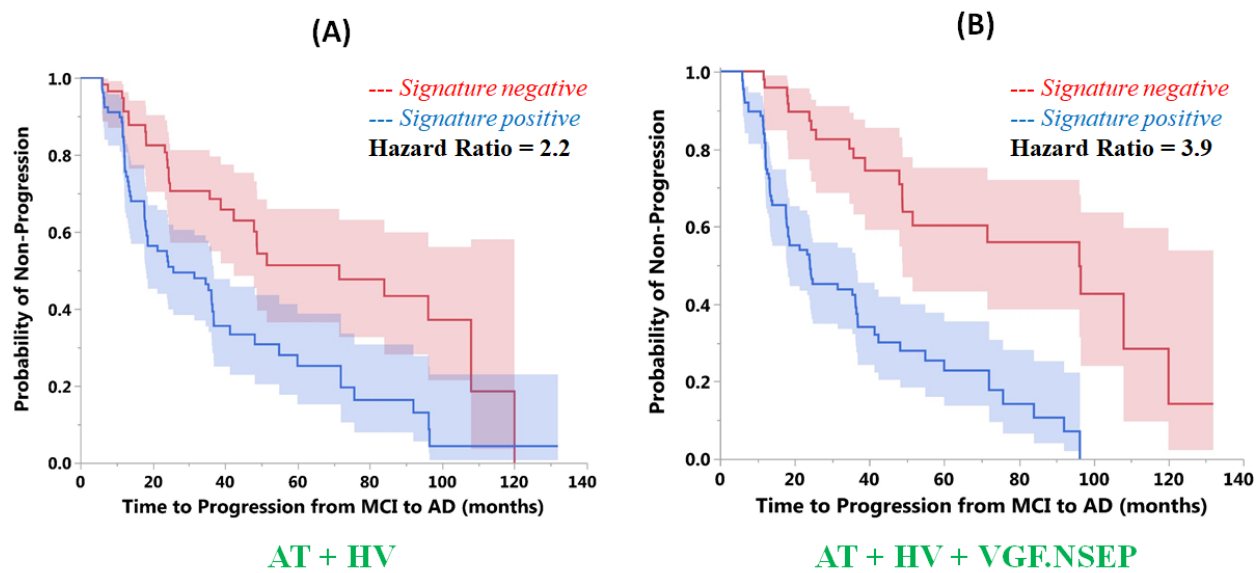

667

668

669 Figure 3:

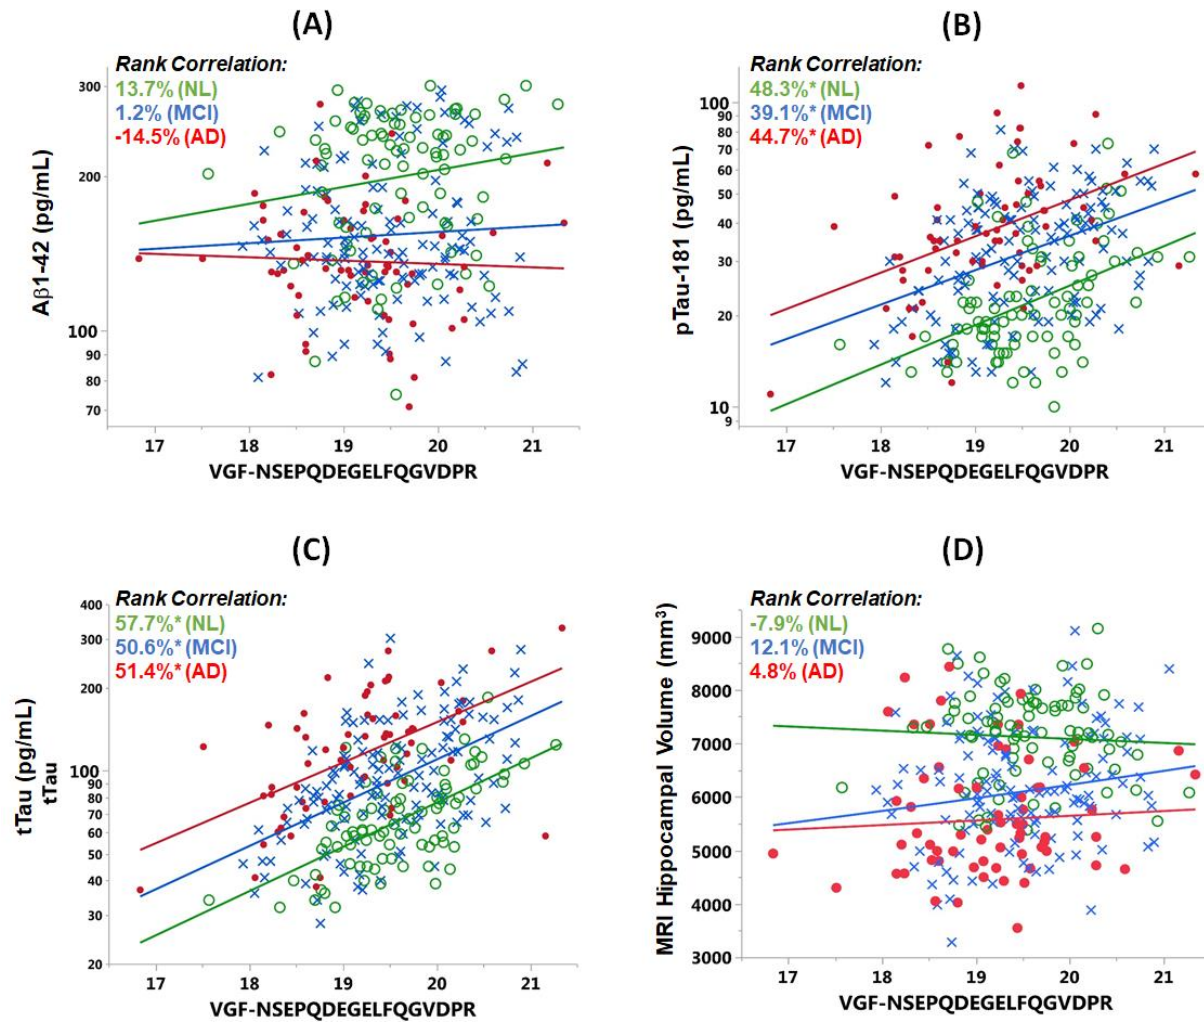

670

671

672 Figure 4:

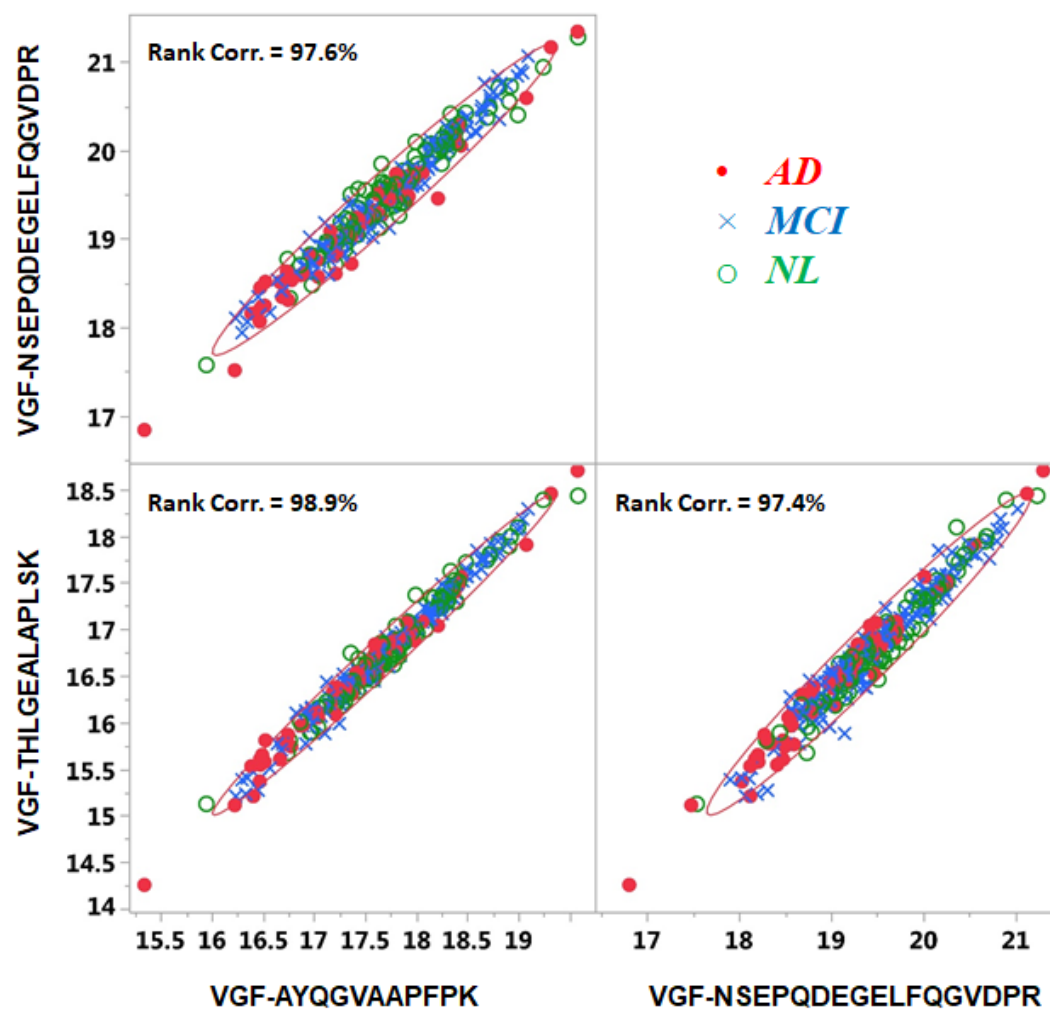

673

674



675 Figure 5:

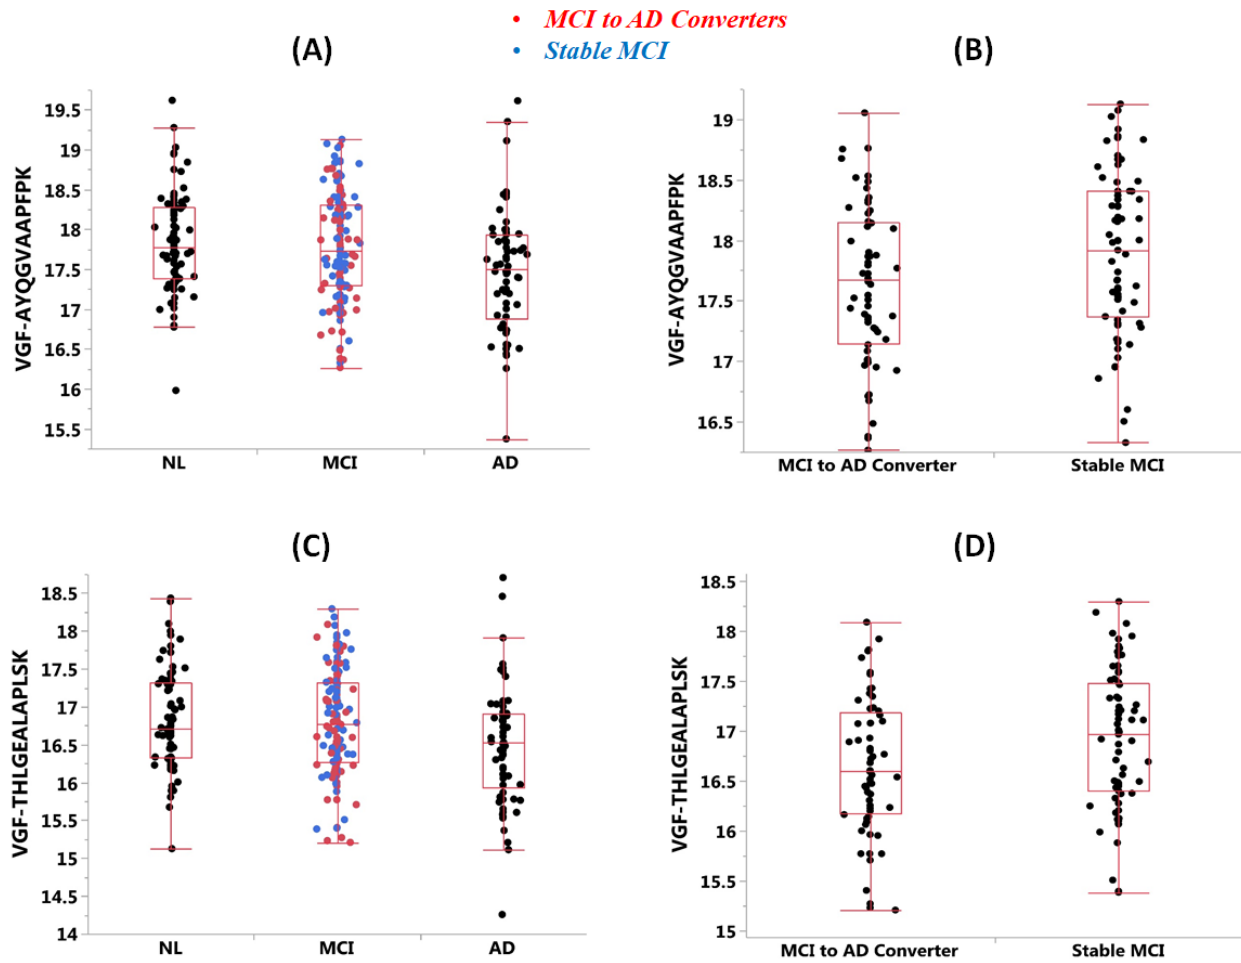

676

677

678 Figure 6:

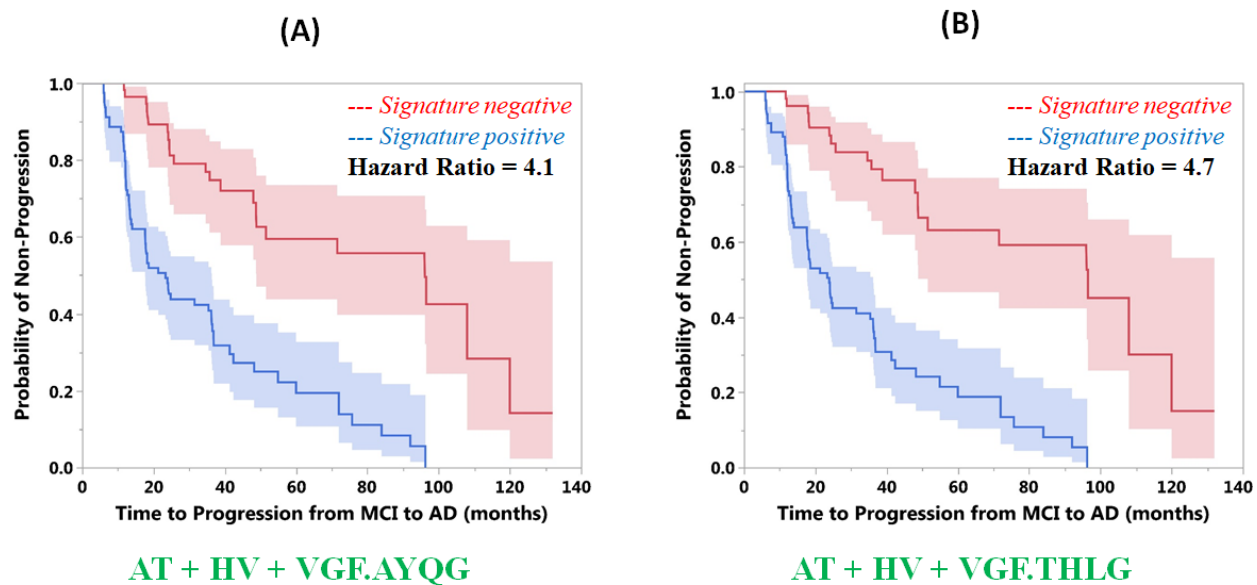

679

680

681 Table 1: Disease-state demographics

|                                          |               | <b>AD</b>     | <b>MCI</b>     | <b>NL</b>     |
|------------------------------------------|---------------|---------------|----------------|---------------|
|                                          |               | <b>(n=66)</b> | <b>(n=135)</b> | <b>(n=86)</b> |
| <b>Gender (n)</b>                        | <b>M</b>      | 37            | 91             | 44            |
|                                          | <b>F</b>      | 29            | 44             | 42            |
| <b>Apo-E (n)</b>                         | <b>E4</b>     | 47            | 71             | 21            |
|                                          | <b>Non-E4</b> | 19            | 64             | 65            |
| <b>Age</b><br>(years, Mean +/- SD)       |               | 75.1 +/- 7.5  | 74.8 +/- 7.4   | 75.8 +/- 5.6  |
| <b>Education</b><br>(years, Mean +/- SD) |               | 15.1 +/- 3    | 16 +/- 3       | 15.6 +/- 3    |
| <b>MMSE</b><br>(Mean +/- SD)             |               | 23.5 +/- 1.9  | 26.9 +/- 1.7   | 29.1 +/- 1    |

|                                          |               | <b>MCI to AD converters</b> | <b>Stable MCI</b> |
|------------------------------------------|---------------|-----------------------------|-------------------|
|                                          |               | <b>(n=64)</b>               | <b>(n=71)</b>     |
| <b>Gender (n)</b>                        | <b>M</b>      | 40                          | 51                |
|                                          | <b>F</b>      | 24                          | 20                |
| <b>Apo-E (n)</b>                         | <b>E4</b>     | 40                          | 31                |
|                                          | <b>Non-E4</b> | 24                          | 40                |
| <b>Age</b><br>(years, Mean +/- SD)       |               | 74.9 +/- 7.6                | 74.7 +/- 7.2      |
| <b>Education</b><br>(years, Mean +/- SD) |               | 15.6 +/- 3.0                | 16.4 +/- 2.9      |
| <b>MMSE</b><br>(Mean +/- SD)             |               | 26.4 +/- 1.7                | 27.4 +/- 1.6      |

682

683

684 Table 2: Performance summary of optimal signatures

| Data type            | Diagnostic Criteria for Signature positive                          | AD versus Normal Diagnosis (internal cross-validation) |             |             | 36m MCI Progression to AD (independent validation) |                    |             |
|----------------------|---------------------------------------------------------------------|--------------------------------------------------------|-------------|-------------|----------------------------------------------------|--------------------|-------------|
|                      |                                                                     | % PPV                                                  | % NPV       | % Accuracy  | % PPV (MCI to AD)                                  | % NPV (Stable MCI) | % Accuracy  |
| <b>AT</b>            | tTau / Ab1-42 > 0.59                                                | 71.6                                                   | 80.5        | 76.5        | 58.1                                               | 66.1               | 61.7        |
| <b>HV</b>            | HV < 6.41 and ApoE4 +                                               | 92.7                                                   | 74.8        | 79.6        | 61.2                                               | 60.5               | 60.7        |
| <b>AT + HV</b>       | HV < 7.0, pTau > 18.1, and tTau / Ab1-42 > 0.36                     | 73.4                                                   | 78.4        | 76.3        | 60.2                                               | 70.2               | 64.4        |
| <b>VGF</b>           | VGF.NSEP < 19.71 and ApoE4 +                                        | <b>69.1</b>                                            | <b>79.1</b> | <b>70.4</b> | <b>65.9</b>                                        | <b>61.5</b>        | <b>63.0</b> |
| <b>AT + VGF</b>      | pTau / Ab1-42 > 0.08, tTau / Ab1-42 > 0.31, and VGF.NSEP < 20.30    | <b>75.4</b>                                            | <b>75.8</b> | <b>75.7</b> | <b>59.6</b>                                        | <b>76.1</b>        | <b>65.2</b> |
| <b>AT + HV + VGF</b> | HV < 7.81, pTau > 16.18, tTau / Ab1-42 > 0.29, and VGF.NSEP < 20.39 | <b>72.3</b>                                            | <b>78.2</b> | <b>75.7</b> | <b>62.1</b>                                        | <b>79.2</b>        | <b>68.1</b> |

685

686

687 Table 3: Time to progression (T2P) of MCI subjects to AD using optimal signatures

| Data type            | Diagnostic Criteria for Signature positive                          | Signature Negative |                         | Signature Positive |                         | Hazard Ratio (95% C.I.) |
|----------------------|---------------------------------------------------------------------|--------------------|-------------------------|--------------------|-------------------------|-------------------------|
|                      |                                                                     | N                  | T2P (months) Q1, Q2, Q3 | N                  | T2P (months) Q1, Q2, Q3 |                         |
| <b>AT</b>            | tTau / Ab1-42 > 0.59                                                | 59                 | 23.4, 71.6, 108         | 76                 | 13.6, 25.7, 72.0        | 1.9 (1.2, 3.1)          |
| <b>HV</b>            | HV < 6.41 and ApoE4 +                                               | 86                 | 18.6, 48.2, 108         | 49                 | 13.1, 31.5, 60.0        | 2.0 (1.3, 3.2)          |
| <b>AT + HV</b>       | HV < 7.0, pTau > 18.1, and tTau / Ab1-42 > 0.36                     | 57                 | 24.4, 71.6, 108         | 78                 | 12.6, 25.7, 72.0        | 2.2 (1.4, 3.6)          |
| <b>VGF</b>           | VGF.NSEP < 19.71 and ApoE4 +                                        | 91                 | 24.0, 48.0, 96.5        | 44                 | 12.2, 18.1, 71.6        | 2.1 (1.3, 3.2)          |
| <b>AT + VGF</b>      | pTau / Ab1-42 > 0.08, tTau / Ab1-42 > 0.31, and VGF.NSEP < 20.30    | 46                 | 38.8, 96.5, 108         | 89                 | 12.6, 24.1, 54.9        | 3.4 (2.1, 5.9)          |
| <b>AT + HV + VGF</b> | HV < 7.81, pTau > 16.18, tTau / Ab1-42 > 0.29, and VGF.NSEP < 20.39 | 48                 | 38.8, 96.2, 120         | 87                 | 12.4, 24.1, 60          | 3.9 (2.3, 7.0)          |

688

689

690 Table 4: Time to progression (T2P) of MCI subjects to AD using optimal and other candidate  
 691 signatures for the AT+HV+MRM scenario

692

| Data type     | Diagnostic Criteria for Signature positive                          | Signature Negative |                         | Signature Positive |                         | Hazard Ratio (95% C.I.) |
|---------------|---------------------------------------------------------------------|--------------------|-------------------------|--------------------|-------------------------|-------------------------|
|               |                                                                     | N                  | T2P (months) Q1, Q2, Q3 | N                  | T2P (months) Q1, Q2, Q3 |                         |
| AT + HV + VGF | HV < 7.81, pTau > 16.18, tTau / Ab1-42 > 0.29, and VGF.NSEP < 20.39 | 48                 | 38.8, 96.2, 120         | 87                 | 12.4, 24.1, 60.0        | 3.9 (2.3, 7.0)          |
|               | HV < 7.81, pTau > 16.18, tTau / Ab1-42 > 0.29, and VGF.AYQG < 18.47 | 56                 | 35.8, 96.2, 120         | 79                 | 12.3, 23.4, 48.3        | 4.1 (2.4, 6.8)          |
|               | HV < 7.81, pTau > 16.18, tTau / Ab1-42 > 0.29, and VGF.THLG < 17.62 | 52                 | 48.0, 96.5, 120         | 83                 | 12.3, 23.9, 48.3        | 4.7 (2.7, 8.2)          |

693
